# Supplementary material
Source: PubMed Central journal article supplement (PMC5984695)

A

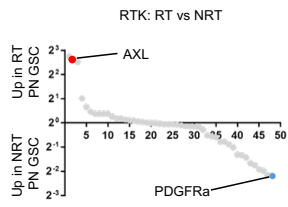

B

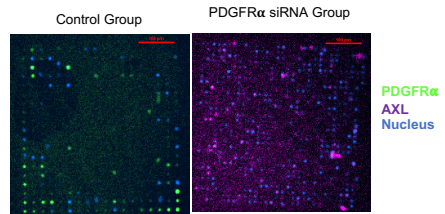

Supplement: NIHMS951064-supplement-1.pdf [file NIHMS951064-supplement-1.pdf]

# Supplementary Figure S2.

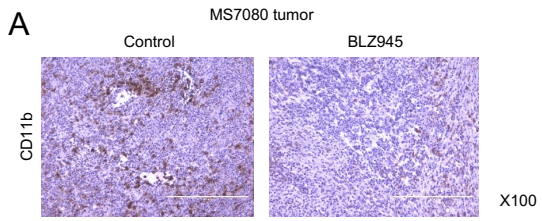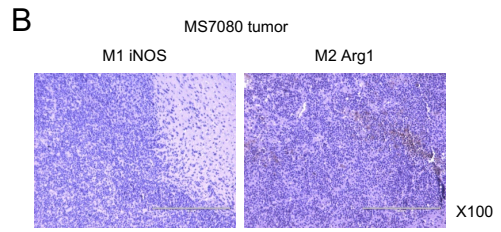

Supplement: NIHMS951064-supplement-2.pdf [file NIHMS951064-supplement-2.pdf]

Supplementary Figure S3.

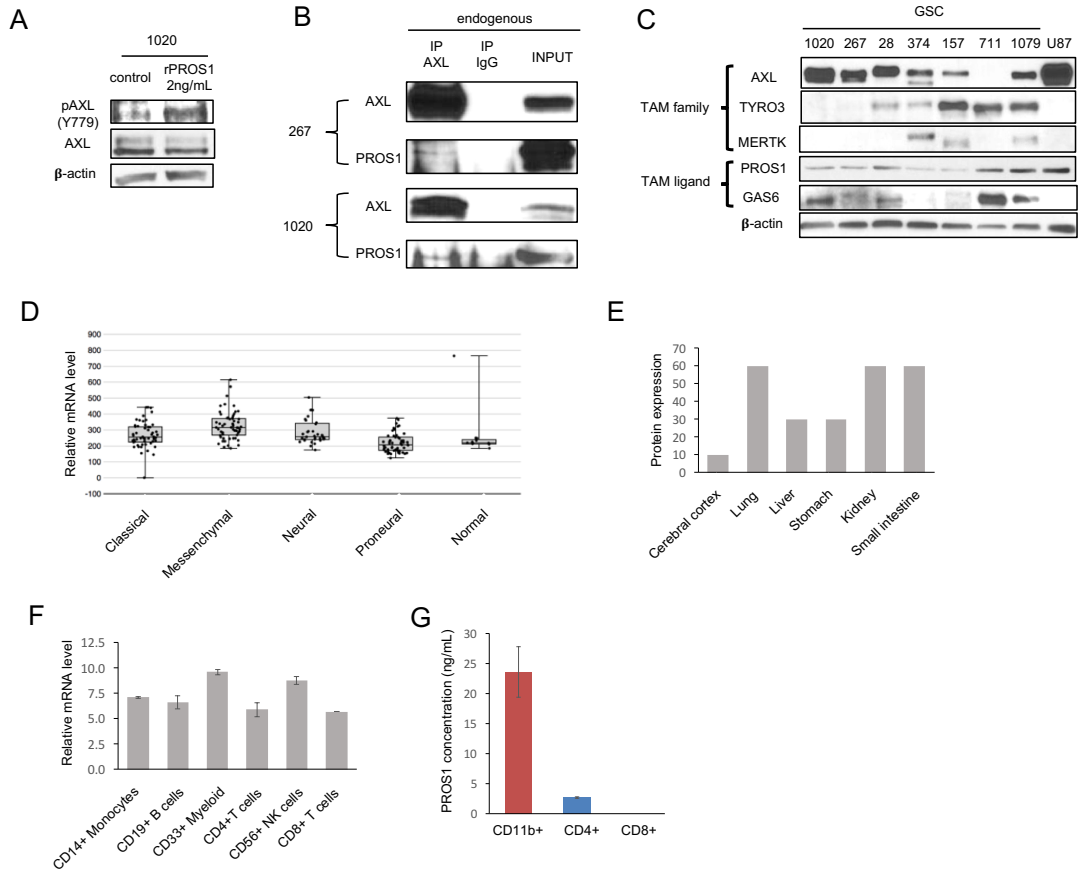

Supplement: NIHMS951064-supplement-3.pdf [file NIHMS951064-supplement-3.pdf]

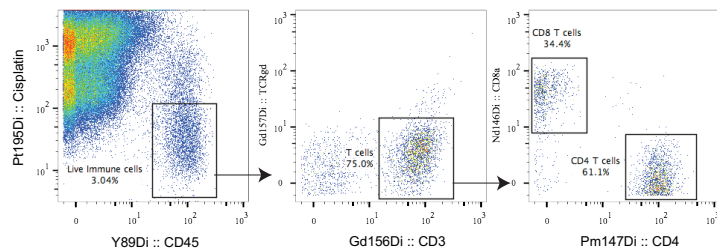

Supplement: NIHMS951064-supplement-4.pdf [file NIHMS951064-supplement-4.pdf]

# Supplementary Figure S5.

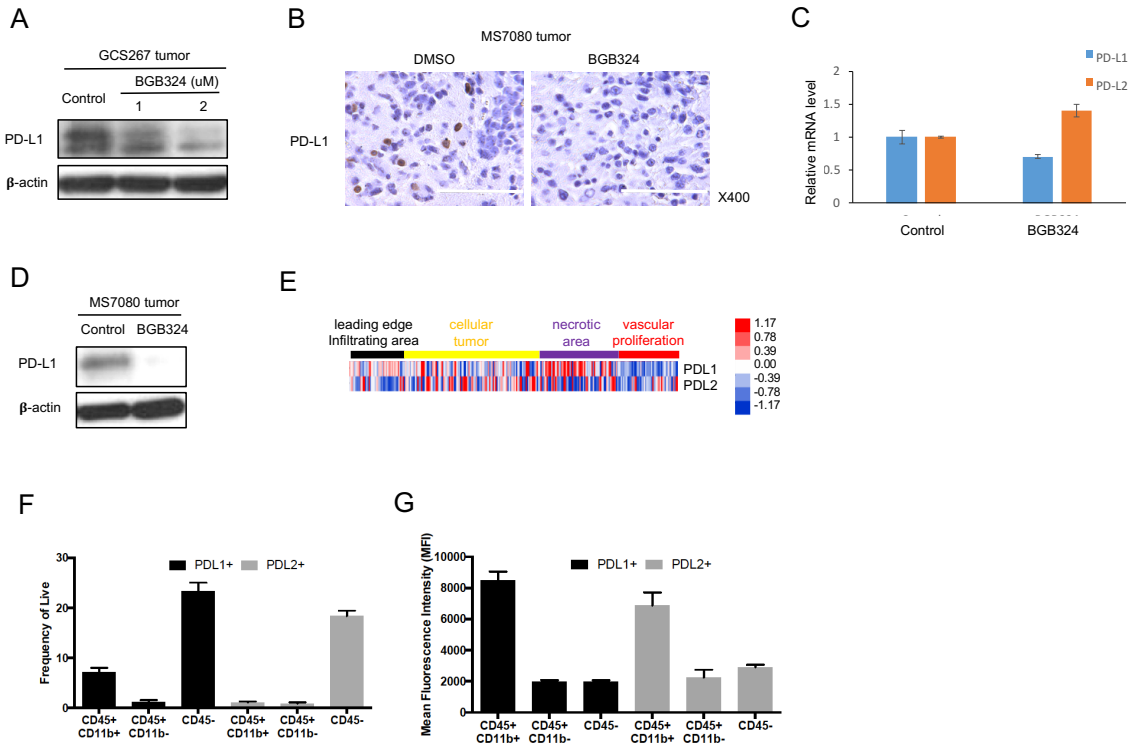

Supplement: NIHMS951064-supplement-5.pdf [file NIHMS951064-supplement-5.pdf]

# Supplementary Figure S6.

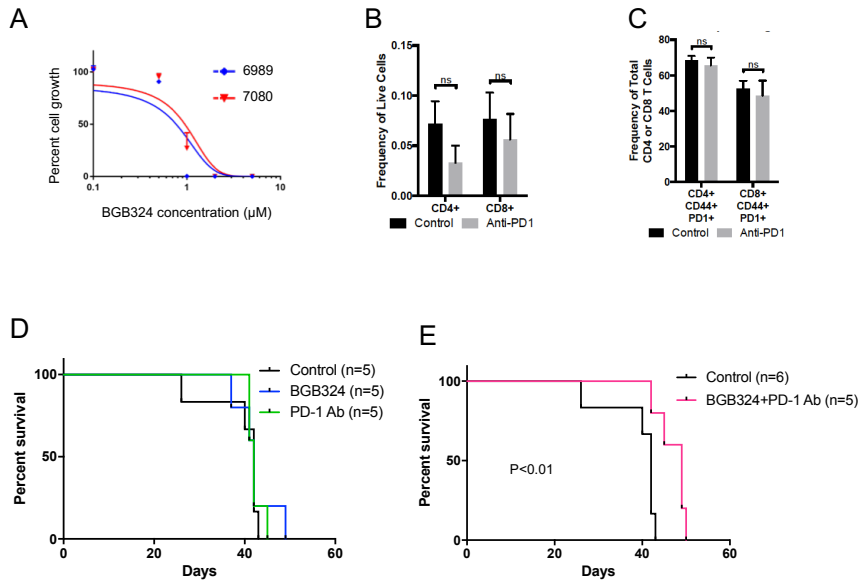

Supplement: NIHMS951064-supplement-6.pdf [file NIHMS951064-supplement-6.pdf]
